# Supplementary material
Source: PubMed Central journal article supplement (PMC8454915)
Supplement: NIHMS1740813-supplement-1.pdf [file NIHMS1740813-supplement-1.pdf]

a1 domain

Multiple sequence alignment for the a1 domain of MHC class I. It shows amino acid sequences for various species including Hs, Rm, Gg, and Sc. The alignment is approximately 450 amino acids long. Conserved residues are indicated by asterisks, and gaps are shown as dashes. A double underline indicates a bridge between Hs and Gg. A light shaded area at the bottom indicates a conserved region.

a2 domain

Multiple sequence alignment for the a2 domain of MHC class I. It shows amino acid sequences for various species including Hs, Rm, Gg, and Sc. The alignment is approximately 450 amino acids long. Conserved residues are indicated by asterisks, and gaps are shown as dashes. A double underline indicates a bridge between Hs and Gg. A light shaded area at the bottom indicates a conserved region.

a3 domain

Multiple sequence alignment for the a3 domain of MHC class I. It shows amino acid sequences for various species including Hs, Rm, Gg, and Sc. The alignment is approximately 450 amino acids long. Conserved residues are indicated by asterisks, and gaps are shown as dashes. A double underline indicates a bridge between Hs and Gg. A light shaded area at the bottom indicates a conserved region.

Supplemental Figure 1. Amino acid alignment of the representative a1-3 domains of MHC class I in cartilaginous fish. The UAA, UBA, UCA, LEA and the new multiplex lineage LEA. GenBank accession numbers are listed in Supplemental Table 1. Dashes indicate gaps, and asterisks indicate the stop codons. s and h indicate the positions and residues, and the line connecting the two Cys in the a2 domain indicates the class I conserved disulfide bridge. Note that the a2 domain cysteines are not present in UCA and LEA. The double underline between the amino acids Hs and Gg indicates the possible salt bridge, while s, h and T indicate the residues that are potential binding sites for CD8 $\alpha$ -microglobulin and T cell receptor, respectively. P marks the invariant residues that are part of the P and C' elements of the bound peptide in the classical class I molecules and p indicates the other 28 potential conserved peptide binding residues. The asterisk marks the Acceptor-Terminator glycosylation site. Arginine indicates the typical Aspartic acid and Glutamic acid residues found in the connecting peptide (Conn; light shade). The potential Asn in the a3 domain perhaps rotting a glycosylation site from some LEA sequences is also underlined. Due to the high diversity in the cytoplasmic tail, the alignment would be mostly speculative. The numbering of amino acid positions is based on human HLA-A2.

### A $\alpha 1$ domain

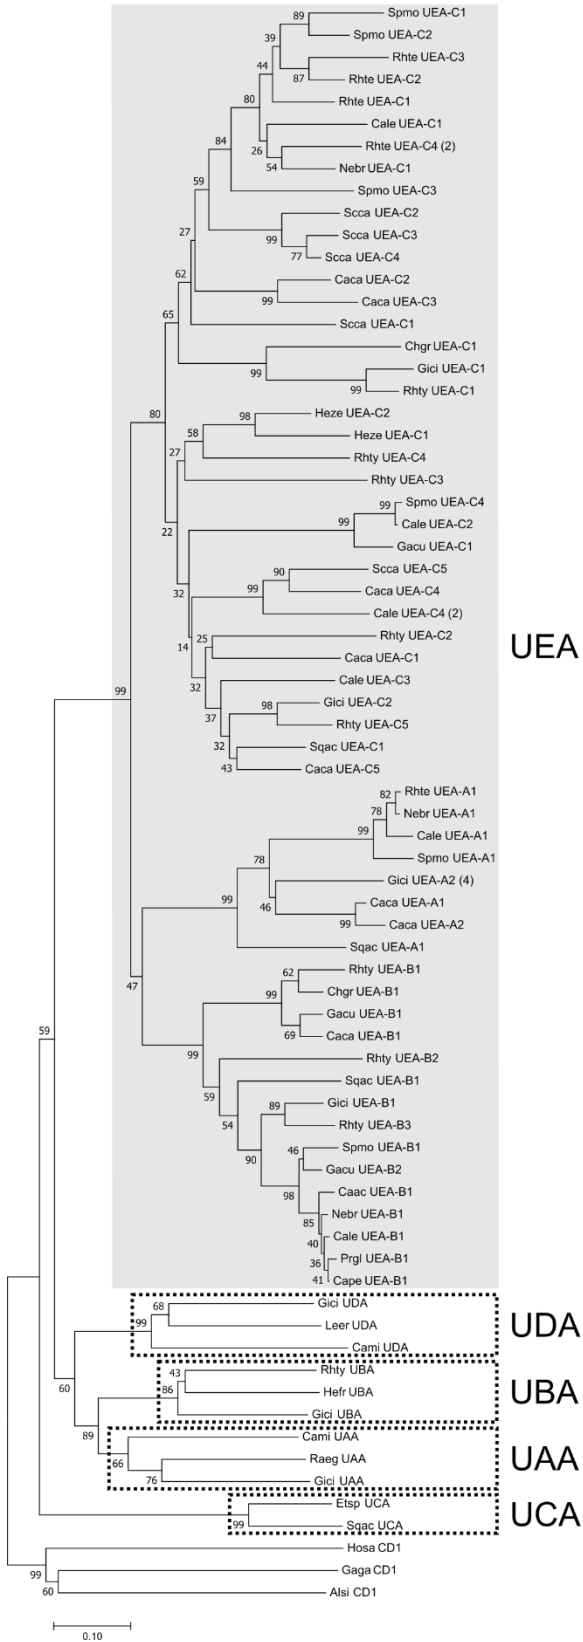

### B $\alpha 2$ domain

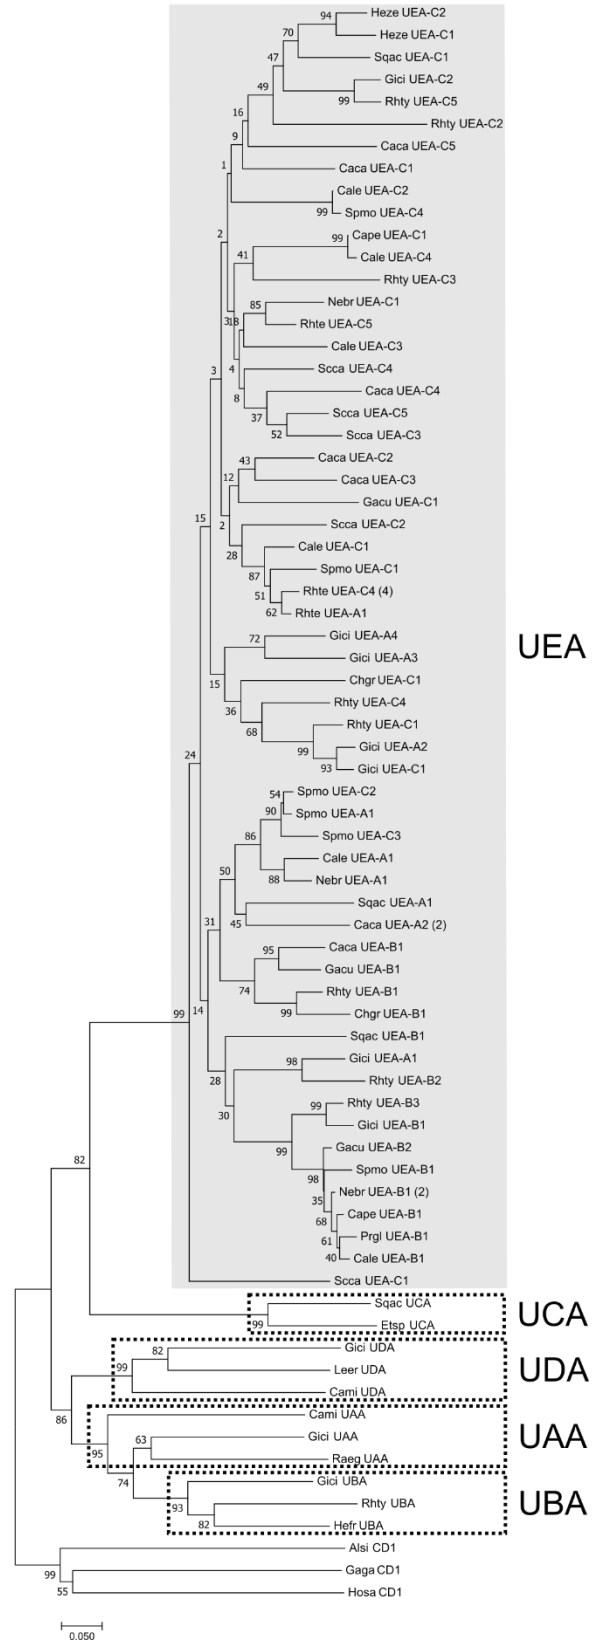

**Supplemental Figure 2.** Phylogenetic trees of cartilaginous fish class I lineages with the  $\alpha 1$  domains (A) and  $\alpha 2$  domains (B). These trees were constructed using the neighbor-joining (NJ) method and rooted with CD1. Bootstrap support values are shown as percentages on the branches. GeneBank accession numbers for all the sequences are listed in Supplemental Table II, and the corresponding alignment is found in Supplemental Figure 1. Common names are shown followed by the abbreviation of the scientific name (two letters of the genus and two letters of species). The sublineages are represented by the letters A, B and C, followed by the number corresponding to a specific sequence. The scale bar indicates the number of amino acid differences per sequence.

Supplemental Table I. Genomic resource used in bioinformatic searches of MHC class I in Chondrichthyan Fish.

| Project  | Group        | Order             | Family                   | Species                           | No. specimens                 | Tissue type                                                                          | Bioproject                   | Reference (doi)                                          |                              |
|----------|--------------|-------------------|--------------------------|-----------------------------------|-------------------------------|--------------------------------------------------------------------------------------|------------------------------|----------------------------------------------------------|------------------------------|
| SRA      | Holocephali  | Chimaeriformes    | Callorhynchidae          | <i>Callorhynchus milii</i>        | 1                             | thymus, testis, spleen, ovary, liver, muscle, kidney, intestine, heart, gills, brain | PRJNA168475                  | 10.1038/nature12826                                      |                              |
|          | Holocephali  | Chimaeriformes    | Callorhynchidae          | <i>Callorhynchus milii</i>        | 32                            | embryos                                                                              | PRJNA135005                  | 10.1126/science.1210912<br>10.12688/f1000research.4996.1 |                              |
|          | Batoidea     | Myliobatiformes   | Dasyatidae               | <i>Neotrygon kuhlii</i>           | 1                             | eyes (retine)                                                                        | PRJNA135005<br>PRJNA292033   | 10.1126/science.1210912<br>10.12688/f1000research.4996.1 |                              |
|          | Batoidea     | Myliobatiformes   | Dasyatidae               | <i>Neotrygon kuhlii</i>           | Multiisolate                  | venom gland                                                                          | PRJNA240112                  | —                                                        |                              |
|          | Batoidea     | Myliobatiformes   | Potamotrygonidae         | <i>Potamotrygon amandae</i>       | Multispecies                  | venom gland                                                                          | PRJNA284840                  | —                                                        |                              |
|          | Batoidea     | Myliobatiformes   | Potamotrygonidae         | <i>Potamotrygon falkneri</i>      | nd                            | nd                                                                                   | PRJNA284840                  | —                                                        |                              |
|          | Batoidea     | Myliobatiformes   | Urotrygonidae            | <i>Urobatis jamaicensis</i>       | 1                             | heart                                                                                | PRJNA313962                  | —                                                        |                              |
|          | Batoidea     | Rajiformes        | Rajidae                  | <i>Amblyraja radiata</i>          | 1                             | testis                                                                               | PRJNA516733                  | —                                                        |                              |
|          | Batoidea     | Rajiformes        | Rajidae                  | <i>Leucoraja erinacea</i>         | 3                             | embryos                                                                              | PRJNA288370                  | 10.1093/database/bar064                                  |                              |
|          | Batoidea     | Rajiformes        | Rajidae                  | <i>Leucoraja erinacea</i>         | 20–29                         | embryos                                                                              | PRJNA135005                  | 10.1126/science.1210912<br>10.12688/f1000research.4996.1 |                              |
|          | Batoidea     | Rajiformes        | Rajidae                  | <i>Leucoraja erinacea</i>         | 4                             | ampullary receptor cells                                                             | PRJNA361222                  | 10.1038/nature21401                                      |                              |
|          | Batoidea     | Rajiformes        | Rajidae                  | <i>Leucoraja erinacea</i>         | 6                             | pectoral fin                                                                         | PRJNA414974                  | 10.1016/j.cell.2018.01.013                               |                              |
|          | Batoidea     | Rajiformes        | Rajidae                  | <i>Leucoraja erinacea</i>         | 2                             | axial skeleton                                                                       | PRJNA497994                  | 10.3389/fevo.2019.00012                                  |                              |
|          | Batoidea     | Rajiformes        | Rajidae                  | <i>Leucoraja erinacea</i>         | 1                             | ampullae of Lorenzini                                                                | PRJNA550453                  | —                                                        |                              |
|          | Batoidea     | Rajiformes        | Rajidae                  | <i>Okamejei kenojei</i>           | 1                             | embryo                                                                               | PRJNA438719                  | 10.1038/sdata.2018.200                                   |                              |
|          | Selachii     | Carcharhiniformes | Carcharhinidae           | <i>Carcharhinus acronotus</i>     | 1                             | white muscle                                                                         | PRJNA274450                  | 10.1186/s12862-016-0696-y                                |                              |
|          | Selachii     | Carcharhiniformes | Carcharhinidae           | <i>Carcharhinus leucas</i>        | 1                             | white muscle                                                                         | PRJNA274450                  | 10.1186/s12862-016-0696-y                                |                              |
|          | Selachii     | Carcharhiniformes | Carcharhinidae           | <i>Carcharhinus leucas</i>        | 4                             | kidney                                                                               | PRJDB8034                    | —                                                        |                              |
|          | Selachii     | Carcharhiniformes | Carcharhinidae           | <i>Carcharhinus perezi</i>        | 1                             | white muscle                                                                         | PRJNA274450                  | 10.1186/s12862-016-0696-y                                |                              |
|          | Selachii     | Carcharhiniformes | Carcharhinidae           | <i>Galeocerdo cuvier</i>          | 1                             | white muscle                                                                         | PRJNA274450                  | 10.1186/s12862-016-0696-y                                |                              |
|          | Selachii     | Carcharhiniformes | Carcharhinidae           | <i>Negaprion brevirostris</i>     | 1                             | white muscle                                                                         | PRJNA274450                  | 10.1186/s12862-016-0696-y                                |                              |
|          | Selachii     | Carcharhiniformes | Carcharhinidae           | <i>Prionace glauca</i>            | 1                             | white muscle                                                                         | PRJNA274450                  | 10.1186/s12862-016-0696-y                                |                              |
|          | Selachii     | Carcharhiniformes | Carcharhinidae           | <i>Prionace glauca</i>            | 1                             | kidney, spleen                                                                       | PRJNA414891                  | 10.1016/j.margen.2017.11.009                             |                              |
|          | Selachii     | Carcharhiniformes | Carcharhinidae           | <i>Rhizoprionodon terraenovae</i> | 1                             | white muscle                                                                         | PRJNA274450                  | 10.1186/s12862-016-0696-y                                |                              |
|          | Selachii     | Carcharhiniformes | Scyliorhinidae           | <i>Scyliorhinus canicula</i>      | 4                             | liver, brain, pancreas                                                               | PRJNA255185                  | 10.1186/1471-2164-15-1074                                |                              |
|          | Selachii     | Carcharhiniformes | Scyliorhinidae           | <i>Scyliorhinus canicula</i>      | at least 2                    | ovary, testis                                                                        | PRJNA504730                  | —                                                        |                              |
|          | Selachii     | Carcharhiniformes | Scyliorhinidae           | <i>Scyliorhinus canicula</i>      | 24–30                         | embryos                                                                              | PRJNA135005                  | 10.1126/science.1210912<br>10.12688/f1000research.4996.1 |                              |
|          | Selachii     | Carcharhiniformes | Sphyrnidae               | <i>Sphyrna mokarran</i>           | 1                             | heart                                                                                | PRJNA313962                  | 10.1186/s12864-016-3411-x                                |                              |
|          | Selachii     | Carcharhiniformes | Triakidae                | <i>Mustelus canis</i>             | 1                             | white muscle                                                                         | PRJNA274450                  | 10.1186/s12862-016-0696-y                                |                              |
|          | Selachii     | Lamniformes       | Cetorhinidae             | <i>Cetorhinus maximus</i>         | nd                            | white muscle                                                                         | PRJNA305977                  | —                                                        |                              |
|          | Selachii     | Lamniformes       | Lamnidae                 | <i>Carcharodon carcharias</i>     | 1                             | heart                                                                                | PRJNA313962                  | 10.1186/s12864-016-3411-x                                |                              |
|          | Selachii     | Lamniformes       | Lamnidae                 | <i>Carcharodon carcharias</i>     | 3                             | muscle, subdermis, epidermis, blood                                                  | PRJNA485795<br>PRJNA177971   | —                                                        |                              |
|          | Selachii     | Lamniformes       | Lamnidae                 | <i>Isurus oxyrinchus</i>          | 1                             | heart                                                                                | PRJNA313962                  | 10.1186/s12864-016-3411-x                                |                              |
|          | Selachii     | Lamniformes       | Odontaspidae             | <i>Carcharias taurus</i>          | 1                             | white muscle                                                                         | PRJNA274450                  | 10.1186/s12862-016-0696-y                                |                              |
|          | Selachii     | Orectolobiformes  | Ginglymostomidae         | <i>Ginglymostoma cirratum</i>     | 1                             | spleen, thymus                                                                       | PRJNA183979                  | 10.1038/nature12826                                      |                              |
|          | Selachii     | Orectolobiformes  | Hemiscyllidae            | <i>Chiloscyllium griseum</i>      | 2                             | spleen, thymus                                                                       | PRJEB4999                    | 10.1371/journal.pone.0100018                             |                              |
|          | Selachii     | Orectolobiformes  | Rhincodontidae           | <i>Rhincodon typus</i>            | 3                             | blood cells                                                                          | PRJDB6260                    | 10.1038/s41559-018-0673-5                                |                              |
|          | Selachii     | Squaliformes      | Etmopteridae             | <i>Etmopterus spinax</i>          | 1                             | ventral skin, eye                                                                    | PRJNA369748                  | 10.1371/journal.pone.0209767                             |                              |
|          | TSA          | Batoidea          | Rajiformes               | Rajidae                           | <i>Leucoraja ocellata</i>     | 4                                                                                    | muscle, liver                | PRJNA319888                                              | 10.1098/rsos.160299          |
|          |              | Batoidea          | Torpediniformes          | Torpedinidae                      | <i>Tetronarce californica</i> | 1                                                                                    | pre-synaptic electric organ  | PRJNA322346                                              | 10.1186/s12864-017-3890-4    |
|          |              | Selachii          | Carcharhiniformes        | Carcharhinidae                    | <i>Prionace glauca</i>        | 1                                                                                    | spleen, thymus               | PRJNA414891                                              | 10.1016/j.margen.2017.11.009 |
|          |              | Selachii          | Heterodontiformes        | Heterodontidae                    | <i>Heterodontus zebra</i>     | 1                                                                                    | embryo                       | PRJNA431332                                              | 10.1038/sdata.2018.197       |
| Selachii | Squaliformes | Squalidae         | <i>Squalus acanthias</i> | 1                                 | liver, ovary, lidney, brain   | PRJEB14721                                                                           | 10.1371/journal.pone.0182756 |                                                          |                              |
| WGS      | Holocephali  | Chimaeriformes    | Callorhynchidae          | <i>Callorhynchus milii</i>        | 1                             | testis                                                                               | PRJNA18361                   | 10.1038/nature12826                                      |                              |
|          | Batoidea     | Rajiformes        | Rajidae                  | <i>Leucoraja erinacea</i>         | 1                             | embryo                                                                               | PRJNA60893                   | 10.1093/database/bar064                                  |                              |
|          | Selachii     | Carcharhiniformes | Scyliorhinidae           | <i>Scyliorhinus torazame</i>      | 1                             | nd                                                                                   | PRJDB6260                    | 10.1038/s41559-018-0673-5                                |                              |
|          | Selachii     | Lamniformes       | Lamnidae                 | <i>Carcharodon carcharias</i>     | 1                             | heart                                                                                | PRJNA269969                  | 10.1073/pnas.1819778116                                  |                              |
|          | Selachii     | Orectolobiformes  | Hemiscyllidae            | <i>Chiloscyllium plagiosum</i>    | nd                            | blood                                                                                | PRJNA478295                  | —                                                        |                              |
|          | Selachii     | Orectolobiformes  | Hemiscyllidae            | <i>Chiloscyllium punctatum</i>    | 1                             | nd                                                                                   | PRJDB6260                    | 10.1038/s41559-018-0673-5                                |                              |
|          | Selachii     | Orectolobiformes  | Rhincodontidae           | <i>Rhincodon typus</i>            | 1                             | spleen, liver                                                                        | PRJNA255419                  | 10.1186/s12864-017-3926-9                                |                              |

nd: No data available.

**Supplemental Table II:** List of sequences used for the studied of MHC class I in cartilaginous fish

| Sample      | Common Name              | Specie                     | Nucleotide Accession Number  | Protein Accession Number      |
|-------------|--------------------------|----------------------------|------------------------------|-------------------------------|
| Gici UAA    | nurse shark              | Gingimostoma cirratum      | AF220063                     | AAF66110                      |
| Raeg UAA    | clearnose skate          | Raja eglanteria            | KC335152                     | AGH32767                      |
| Camu UAA    | elephant shark           | Callorhynchus milii        | JW872001                     | AFP04519                      |
| Hefr UBA    | horn shark               | Heterodontus francisci     | AF028558                     | AA060348                      |
| Rhty UBA    | whale shark              | Rhincodon typus            | XM_020536967                 | XP_020392556                  |
| Gici UBA    | nurse shark              | Gingimostoma cirratum      | AF028557                     | AA060347                      |
| Xela UAA    | african clawed frog      | Xenopus laevis             | L20733                       | AAA16064                      |
| Gaga BF1    | chicken                  | Gallus gallus              | NM_001044683                 | NP_001038148                  |
| Mumu H2D    | mouse                    | Mus musculus               | M23444                       | AAA39567                      |
| Hosa HLA-A  | human                    | Homo sapiens               | U18930                       | AAA87076                      |
| Lach U      | coelacanth               | Latimeria chalumnae        | XM_014491396                 | XP_014346882                  |
| Leoc U      | spotted gar              | Lepisosteus oculatus       | XM_015339735                 | XP_015196221                  |
| Acisi U     | chinese sturgeon         | Acipenser sinensis         | GQ485578                     | ACV87433                      |
| Leer UDA    | little skate             | Leucoraja erinacea         | LS-transcriptB2-ctg40765*    | nd                            |
| Gici UDA    | nurse shark              | Gingimostoma cirratum      | MN339476                     | nd                            |
| Camu UDA    | elephant shark           | Callorhynchus milii        | JW870817                     | AFP03335                      |
| Leoc Z      | spotted gar              | Lepisosteus oculatus       | GFM101040660                 | nd                            |
| Teni Z      | tetraodon                | Tetraodon nigroviridis     | nd                           | CAF90807                      |
| Dare Z      | zebra fish               | Danio rerio                | KC607850                     | AHA37389                      |
| Sqac UCA    | spiny dogfish            | Squalus acanthias          | AF515705                     | AAAN78091                     |
| Etsp UCA    | velvet belly             | Etmopterus spinax          | NODE_21300_length_1311       | nd                            |
| Sqac UEA-C1 | spiny dogfish            | Squalus acanthias          | HAGW01116852                 | nd                            |
| Sqac UEA-B1 | spiny dogfish            | Squalus acanthias          | HAGU01093266                 | nd                            |
| Sqac UEA-A1 | spiny dogfish            | Squalus acanthias          | HAGT01097031                 | nd                            |
| Heze UEA-C1 | zebra bullhead shark     | Heterodontus zebra         | GGL01273748                  | nd                            |
| Heze UEA-C2 | zebra bullhead shark     | Heterodontus zebra         | GGL01273734                  | nd                            |
| Gici UEA-A1 | nurse shark              | Gingimostoma cirratum      | epigonal.TR369523_c3_g7_i20  | nd                            |
| Gici UEA-A2 | nurse shark              | Gingimostoma cirratum      | spleen.comp334747_c4_seq45   | nd                            |
| Gici UEA-A3 | nurse shark              | Gingimostoma cirratum      | NODE_26056_length_1453       | nd                            |
| Gici UEA-A4 | nurse shark              | Gingimostoma cirratum      | spleen.comp334747_c4_seq43   | nd                            |
| Gici UEA-B1 | nurse shark              | Gingimostoma cirratum      | epigonal.TR369523_c3_g7_i17  | nd                            |
| Gici UEA-C1 | nurse shark              | Gingimostoma cirratum      | epigonal.TR369523_c3_g7_i16  | nd                            |
| Gici UEA-C2 | nurse shark              | Gingimostoma cirratum      | thymus.comp349191_c5_seq12   | nd                            |
| Chgr UEA-B1 | grey bamboo shark        | Chiloscyllium griseum      | NODE_37004_length_984        | nd                            |
| Chgr UEA-C1 | grey bamboo shark        | Chiloscyllium griseum      | NODE_16046_length_2065       | nd                            |
| Rhty UEA-B1 | whale shark              | Rhincodon typus            | XM_020522040                 | XP_020377629                  |
| Rhty UEA-B2 | whale shark              | Rhincodon typus            | NODE_17269_length_1605       | nd                            |
| Rhty UEA-B3 | whale shark              | Rhincodon typus            | XM_020522039                 | XP_020377628                  |
| Rhty UEA-C1 | whale shark              | Rhincodon typus            | XM_020509571                 | XP_020365160                  |
| Rhty UEA-C2 | whale shark              | Rhincodon typus            | NODE_2223_length_4069        | nd                            |
| Rhty UEA-C3 | whale shark              | Rhincodon typus            | XM_020510578                 | XP_020366167                  |
| Rhty UEA-C4 | whale shark              | Rhincodon typus            | XM_020528997                 | XP_020384586                  |
| Rhty UEA-C5 | whale shark              | Rhincodon typus            | NODE_15126_length_1815       | nd                            |
| Cale UEA-A1 | bul shark                | Carcharhinus leUEAs        | 003_NODE_22119_length_2064   | nd                            |
| Cale UEA-B1 | bul shark                | Carcharhinus leUEAs        | 003_NODE_3965_length_5162    | nd                            |
| Cale UEA-C1 | bul shark                | Carcharhinus leUEAs        | NODE_44384_length_1450       | nd                            |
| Cale UEA-C2 | bul shark                | Carcharhinus leUEAs        | 003_NODE_42772_length_1051   | nd                            |
| Cale UEA-C3 | bul shark                | Carcharhinus leUEAs        | 003_NODE_31356_length_1230   | nd                            |
| Cale UEA-C4 | bul shark                | Carcharhinus leUEAs        | NODE_54089_length_1169       | nd                            |
| Caca UEA-C1 | great white shark        | Carcharodon carcharias     | 021_4_NODE_11670_length_2979 | nd                            |
| Caca UEA-C2 | great white shark        | Carcharodon carcharias     | 021_3_NODE_12626_length_1777 | nd                            |
| Caca UEA-C3 | great white shark        | Carcharodon carcharias     | 021_3_NODE_20018_length_1708 | nd                            |
| Caca UEA-C4 | great white shark        | Carcharodon carcharias     | 021_3_NODE_23139_length_1474 | nd                            |
| Caca UEA-C5 | great white shark        | Carcharodon carcharias     | 021_3_NODE_35710_length_864  | nd                            |
| Caca UEA-A1 | great white shark        | Carcharodon carcharias     | 021_3_NODE_21051_length_1627 | nd                            |
| Caca UEA-A2 | great white shark        | Carcharodon carcharias     | 021_2_NODE_3507_length_1252  | nd                            |
| Caca UEA-B1 | great white shark        | Carcharodon carcharias     | 021_3_NODE_19998_length_1710 | nd                            |
| Caac UEA-B1 | backnose shark           | Carcharhinus acronotus     | NODE_14517_length_2054       | nd                            |
| Spmo UEA-A1 | great hammerhead         | Sphyrna mokarran           | NODE_26619_length_1253       | nd                            |
| Spmo UEA-B1 | great hammerhead         | Sphyrna mokarran           | NODE_24502_length_1385       | nd                            |
| Spmo UEA-C1 | great hammerhead         | Sphyrna mokarran           | NODE_15205_length_2271       | nd                            |
| Spmo UEA-C2 | great hammerhead         | Sphyrna mokarran           | NODE_30986_length_1033       | nd                            |
| Spmo UEA-C3 | great hammerhead         | Sphyrna mokarran           | NODE_26620_length_1253       | nd                            |
| Spmo UEA-C4 | great hammerhead         | Sphyrna mokarran           | NODE_10788_length_2968       | nd                            |
| Scca UEA-C1 | lesser spotted dogfish   | Scyliorhinus canicula      | 012_NODE_23542_length_1184   | nd                            |
| Scca UEA-C2 | lesser spotted dogfish   | Scyliorhinus canicula      | 012_NODE_17951_length_1595   | nd                            |
| Scca UEA-C3 | lesser spotted dogfish   | Scyliorhinus canicula      | 011_NODE_28234_length_1020   | nd                            |
| Scca UEA-C5 | lesser spotted dogfish   | Scyliorhinus canicula      | 011_NODE_27984_length_1029   | nd                            |
| Rhte UEA-A1 | atlantic sharpnose shark | Rhizoprionodon terraenovae | NODE_16706_length_1105       | nd                            |
| Rhte UEA-C1 | atlantic sharpnose shark | Rhizoprionodon terraenovae | NODE_11875_length_1581       | nd                            |
| Rhte UEA-C2 | atlantic sharpnose shark | Rhizoprionodon terraenovae | NODE_11164_length_1679       | nd                            |
| Rhte UEA-C3 | atlantic sharpnose shark | Rhizoprionodon terraenovae | NODE_3919_length_3393        | nd                            |
| Rhte UEA-C4 | atlantic sharpnose shark | Rhizoprionodon terraenovae | NODE_11862_length_1583       | nd                            |
| Rhte UEA-C5 | atlantic sharpnose shark | Rhizoprionodon terraenovae | NODE_11863_length_1583       | nd                            |
| Prgi UEA-B1 | blue shark               | Prionace glauca            | NODE_8161_length_2072        | nd                            |
| Nebr UEA-A1 | lemon shark              | Negaprion brevirostris     | NODE_5283_length_2521        | nd                            |
| Nebr UEA-B1 | lemon shark              | Negaprion brevirostris     | NODE_7370_length_2018        | nd                            |
| Nebr UEA-C1 | lemon shark              | Negaprion brevirostris     | NODE_6259_length_2264        | nd                            |
| Gacu UEA-B1 | tiger shark              | Galeocerdo cuvier          | NODE_30512_length_1068       | nd                            |
| Gacu UEA-B2 | tiger shark              | Galeocerdo cuvier          | NODE_16880_length_2046       | nd                            |
| Gacu UEA-C1 | tiger shark              | Galeocerdo cuvier          | NODE_30425_length_1072       | nd                            |
| Cape UEA-B1 | caribbean reef shark     | Carcharhinus perezi        | NODE_13043_length_2062       | nd                            |
| Cape UEA-C1 | caribbean reef shark     | Carcharhinus perezi        | NODE_20712_length_1239       | nd                            |
| Icpu S      | channel catfish          | Ictalurus punctatus        | JT320438                     | nd                            |
| Sasa S      | atlantic salmon          | Salmo salar                | ACY30362                     | nd                            |
| Plal S      | ayu                      | Plecoglossus altivelis     | JP747954                     | nd                            |
| Leoc L      | spotted gar              | Lepisosteus oculatus       | XM_015339776                 | XP_015196262                  |
| Omi-L       | tilapia                  | Oreochromis niloticus      | ENSONIG00000001466           | ENSONIT00000001840            |
| Sasa L      | atlantic salmon          | Salmo salar                | XM_014127629                 | XP_0139631004                 |
| Hosa CD1    | human                    | Homo sapiens               | M28262                       | AAA51939                      |
| Gaga CD1    | chicken                  | Gallus gallus              | AY849319                     | AAAX49405                     |
| Alsi CD1    | chinese alligator        | Alligator sinensis CD1     | KJ191190                     | AI277408                      |
| Xetr 112    | western clawed frog      | Xenopus tropicalis         | XM_002934793                 | XP_002934839                  |
| Alsi 112    | chinese alligator        | Alligator sinensis         | XM_006037891                 | XP_006037953                  |
| Chmy 112    | green sea turtle         | Chelonia mydas             | KB575999.1                   | EMP26826                      |
| Gamo P      | atlantic cod             | Gadus morhua               | P_GW844691.1                 | nd                            |
| Teni P      | tetraodon                | Tetraodon nigroviridis     | nd                           | nd (TNS_Grimholt et al. 2015) |
| Leoc P      | spotted gar              | Lepisosteus oculatus       | NM_015339565                 | XP_015196051                  |
| Mumu FcRn   | mouse                    | Mus musculus               | NM_010189                    | NP_034319                     |
| Bota FcRn   | cow                      | Bos taurus                 | XM_005219177                 | XP_005219234                  |
| Hosa FcRn   | human                    | Homo sapiens               | NM_001136019                 | NP_001129491                  |
| Leoc H-1    | spotted gar              | Lepisosteus oculatus       | XM_015339736                 | XP_015196222                  |
| Leoc H      | spotted gar              | Lepisosteus oculatus       | XM_015361424                 | XP_015216910                  |
| Xela 18004  | african clawed frog      | Xenopus laevis             | XM_018253839                 | XP_018109328                  |
| Xetr 18004  | western clawed frog      | Xenopus tropicalis         | NM_001278434                 | NP_001285363                  |
| Bota MR1    | cow                      | Bos taurus                 | NM_001190298                 | NP_001117727                  |
| Mumu MR1    | mouse                    | Mus musculus               | NM_006209                    | NP_032235                     |
| Rano MR1    | rat                      | Rattus norvegicus          | CH473658                     | EDM05513                      |
| Xela 145    | african clawed frog      | Xenopus laevis             | XM_018231157                 | XP_018088646                  |
| Xetr 145    | western clawed frog      | Xenopus tropicalis         | XM_012969674                 | XP_012825128                  |

\*The sequences are obtained from skate database (<http://skatebase.org/>). The remaining sequences are obtained from NCBI (<https://www.ncbi.nlm.nih.gov/>); nd meaning no data
